# Supplementary material for: Circular RNA Cdr1as Upregulates SCAI to Suppress Cisplatin Resistance in Ovarian Cancer via miR-1270 Suppression
Source: PubMed Central journal article supplement — Mol Ther Nucleic Acids. 2019 Jul 29;18:24–33. doi: 10.1016/j.omtn.2019.07.012 (PMC6726918; doi:10.1016/j.omtn.2019.07.012), 2019-07-29
Supplement: mmc1.pdf [file mmc1.pdf]

**OMTN, Volume 18**

**Supplemental Information**

**Circular RNA Cdr1as Upregulates SCAI  
to Suppress Cisplatin Resistance in Ovarian  
Cancer via miR-1270 Suppression**

**Zhao Zhao, Mei Ji, Qianqing Wang, Nannan He, and Yue Li**

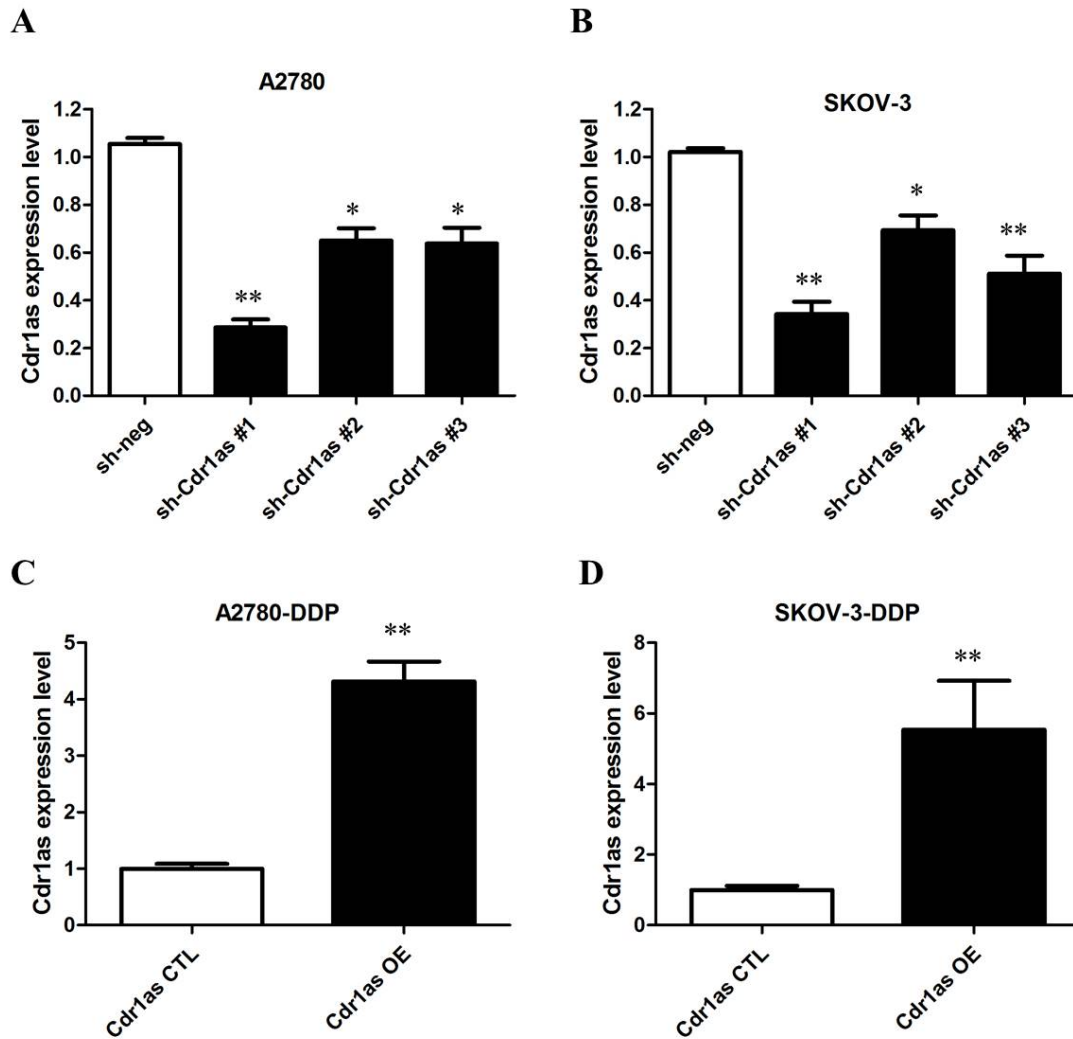

**Figure S1** (A) The qRT-PCR analysis confirmed that Cdr1as expression level was significantly downregulated in A2780 cells by sh-Cdr1as #1 instead of sh-Cdr1as #2 and sh-Cdr1as #3; (B) The qRT-PCR analysis confirmed that Cdr1as expression level was significantly downregulated in SKOV-3 cells by sh-Cdr1as #1 instead of sh-Cdr1as #2 and sh-Cdr1as #3; (C) The qRT-PCR assay indicated the relative abundance of Cdr1as in A2780-DDP cells infected with Cdr1as overexpressing adenovirus (Cdr1as OE) or control GFP adenovirus (Cdr1as CTL); (D) The qRT-PCR assay indicated the relative abundance of Cdr1as in SKOV-3-DDP cells

infected with Cdr1as overexpressing adenovirus (Cdr1as OE) or control GFP adenovirus (Cdr1as CTL); All tests were at least performed three times. Data were expressed as mean  $\pm$  SD. \*\*\*P < 0.001; \*\*P < 0.01;

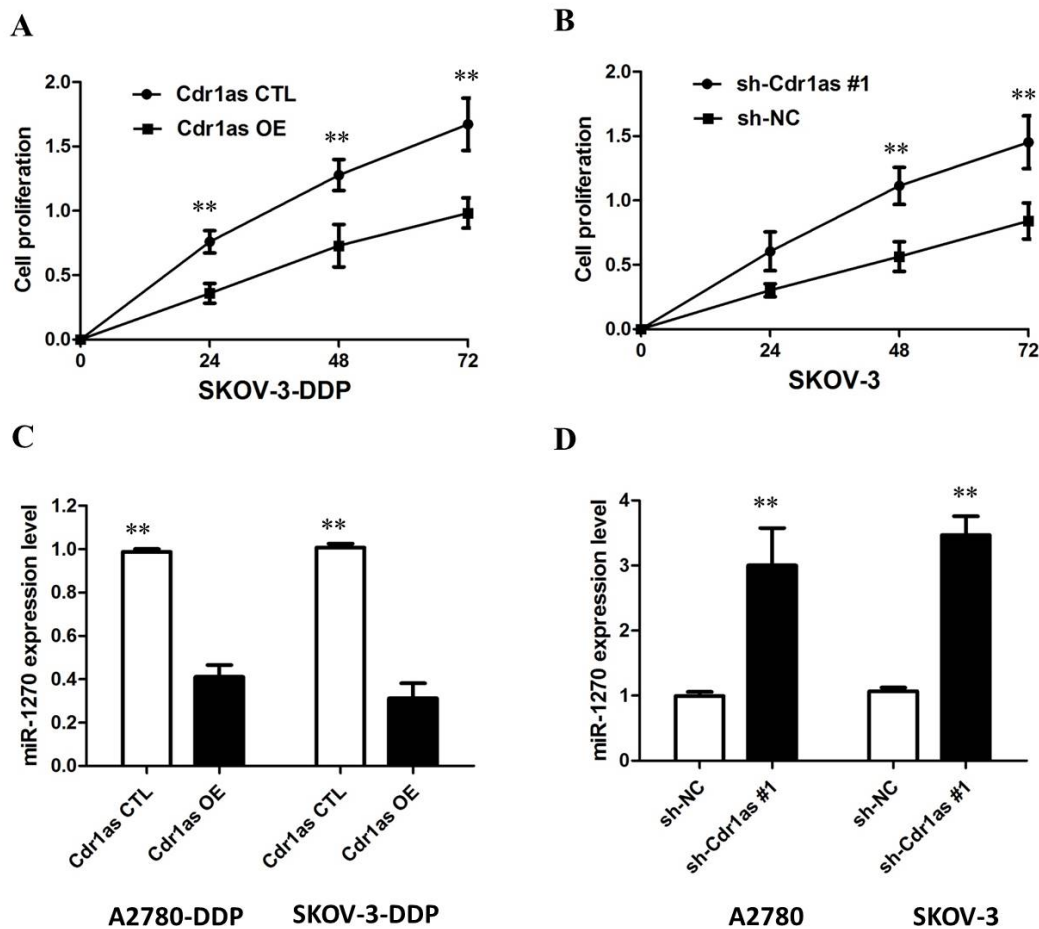

**Figure S2** (A) CCK-8 assay showed that Cdr1as overexpression could dramatically inhibit the proliferation of SKOV-3-DDP in the presence of cisplatin (20  $\mu$ M); (B) CCK-8 assay showed that inhibition of Cdr1as promoted the proliferation of SKOV-3 cells in the presence of cisplatin (20  $\mu$ M); (C) Inhibition of Cdr1as increased the expression level of miR-1270 in A2780 and SKOV-3 cells; (D) Overexpression of Cdr1as decreased the expression level of miR-1270 in A2780-DDP and

SKOV-3-DDP cells; All tests were at least performed three times. Data were expressed as mean  $\pm$  SD. \*\*\*P < 0.001;\*\*P < 0.01;
